# Supplementary material
Source: PubMed Central journal article supplement (PMC2962527)
Supplement: supp_M110.142091_jbc.M110.142091-1.pdf [file supp_M110.142091_jbc.M110.142091-1.pdf]

**Supplementary Figures****Supplemental Figure 1**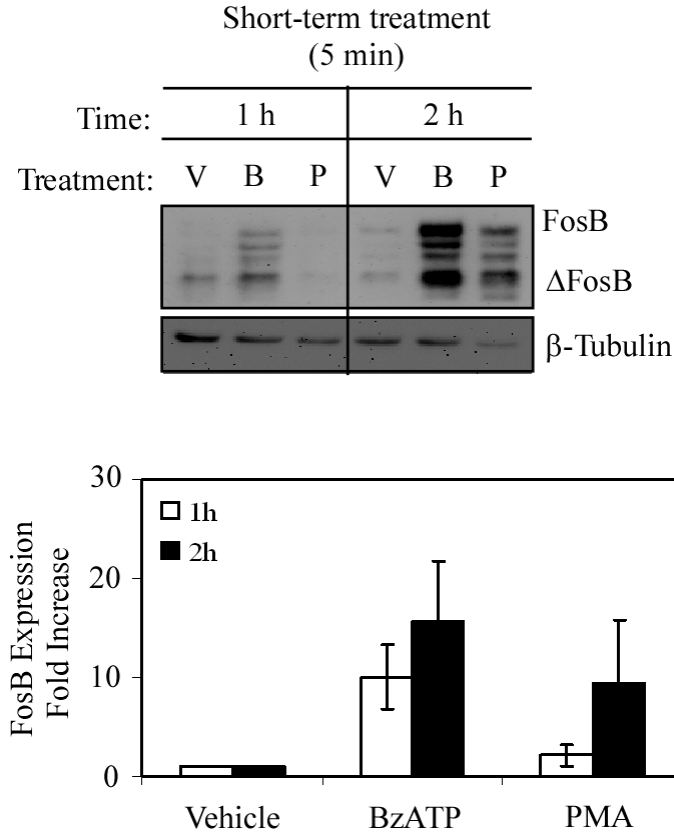

Supplemental Figure 1. **Short-term treatment with P2RX7 agonist induces FosB induction in MC3T3 osteoblastic cells.** MC3T3-E1 cells were treated with vehicle (V), 250  $\mu$ M BzATP (B) or 1  $\mu$ g/mL PMA (P) for 5 min. The wells were subsequently washed twice with HBSS and incubated at 37  $^{\circ}$ C with fresh complete MEM- $\alpha$  media for the indicated times and immunoblotted for FosB expression. A representative immunoblot displaying FosB/ $\Delta$ FosB protein expression in each cell line is shown (n = 3). The results of three independent experiments were combined and represent relative FosB from short-term treatment (mean  $\pm$  SEM).

## Supplemental Figure 2

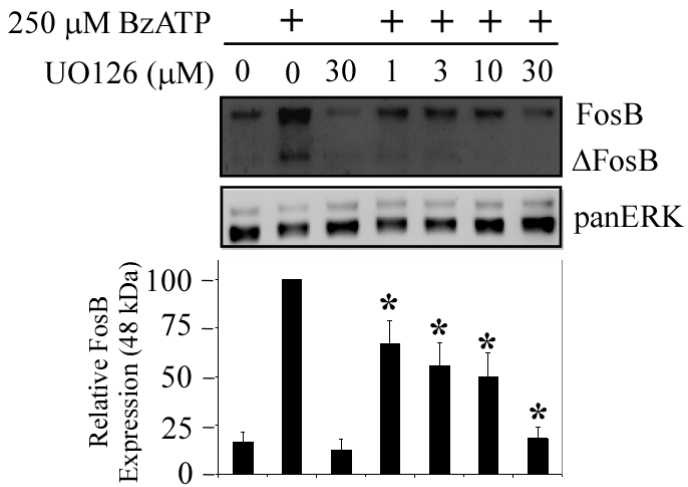

Supplemental Figure 2. **ERK1/2 kinase inhibitor attenuates P2RX7-induced AP-1 protein expression in primary human monocytes.** Purified peripheral blood monocytes from five separate patients were pre-treated for 15 min with either vehicle (DMSO) or the MEK-1/2 inhibitor UO126 at the indicated concentrations. The cells were subsequently treated with either vehicle (2.5 mM HEPES) or 250  $\mu$ M BzATP for 2 h. A representative immunoblot displaying FosB protein expression is shown. Densitometry results were combined and are represented as a percent of BzATP-induced AP-1 protein expression (mean  $\pm$  SEM). \*  $p < 0.05$  compared to vehicle pre-treated BzATP-induced FosB/JunB expression.
